# Supplementary material for: Formal total synthesis of histrionicotoxin alkaloids via Hg(OTf)2-catalyzed cycloisomerization and SmI2-induced ring expansion
Source: Royal Society of Chemistry journal article supplement (doi:10.1039/c8ra02011f), 2018-01-01

## Electronic Supplementary Information

# Formal total synthesis of histrionicotoxin alkaloids *via* Hg(OTf)<sub>2</sub>-catalyzed cycloisomerization and SmI<sub>2</sub>-induced ring expansion

Kunihiro Matsumura,<sup>a</sup> Keisuke Nishikawa,<sup>a</sup> Hiroaki Yoshida,<sup>a</sup> Matsumi Doe<sup>a</sup>  
and Yoshiki Morimoto<sup>\*a</sup>

<sup>a</sup> Department of Chemistry, Graduate School of Science, Osaka City University, Sumiyoshi-ku,  
Osaka 558-8585, Japan

### Table of Contents

<sup>1</sup>H and <sup>13</sup>C NMR spectra of synthetic compounds **3–6**, **8**, **11**, *eq-12*, *ax-12*, and **13–16**: S2–S4,  
S6, S8, S10, S12–S15, S17, and S19

NOESY spectra of compounds **4**, **5**, **11**, *eq-12*, *ax-12*, and **16**: S5, S7, S9, S11, S16, and S18

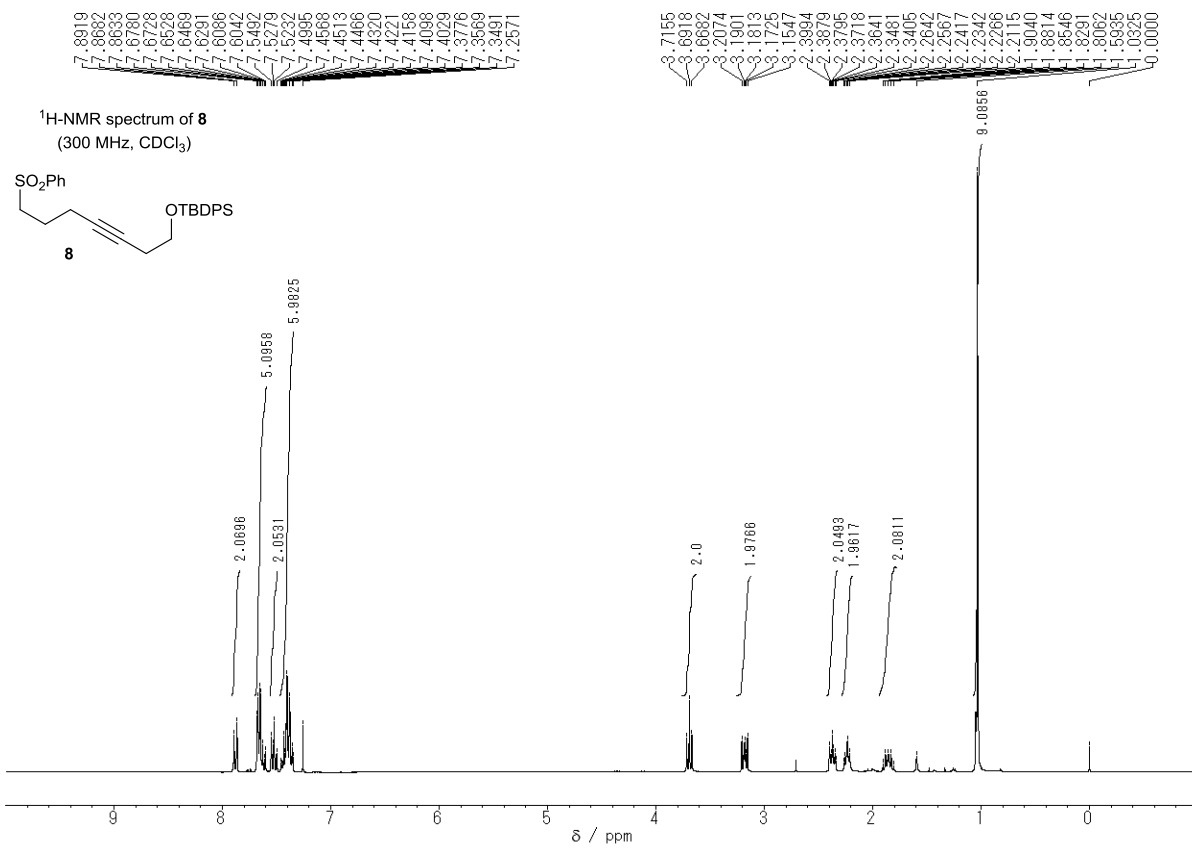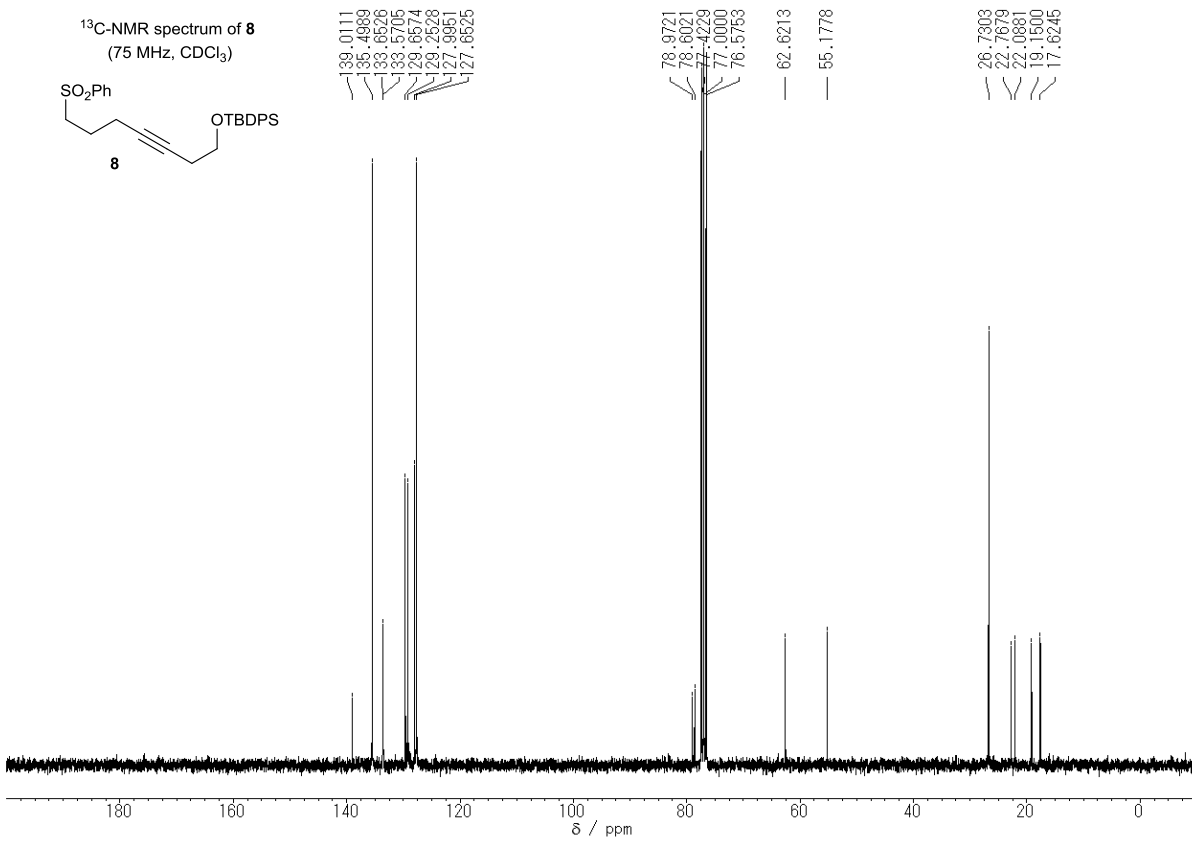

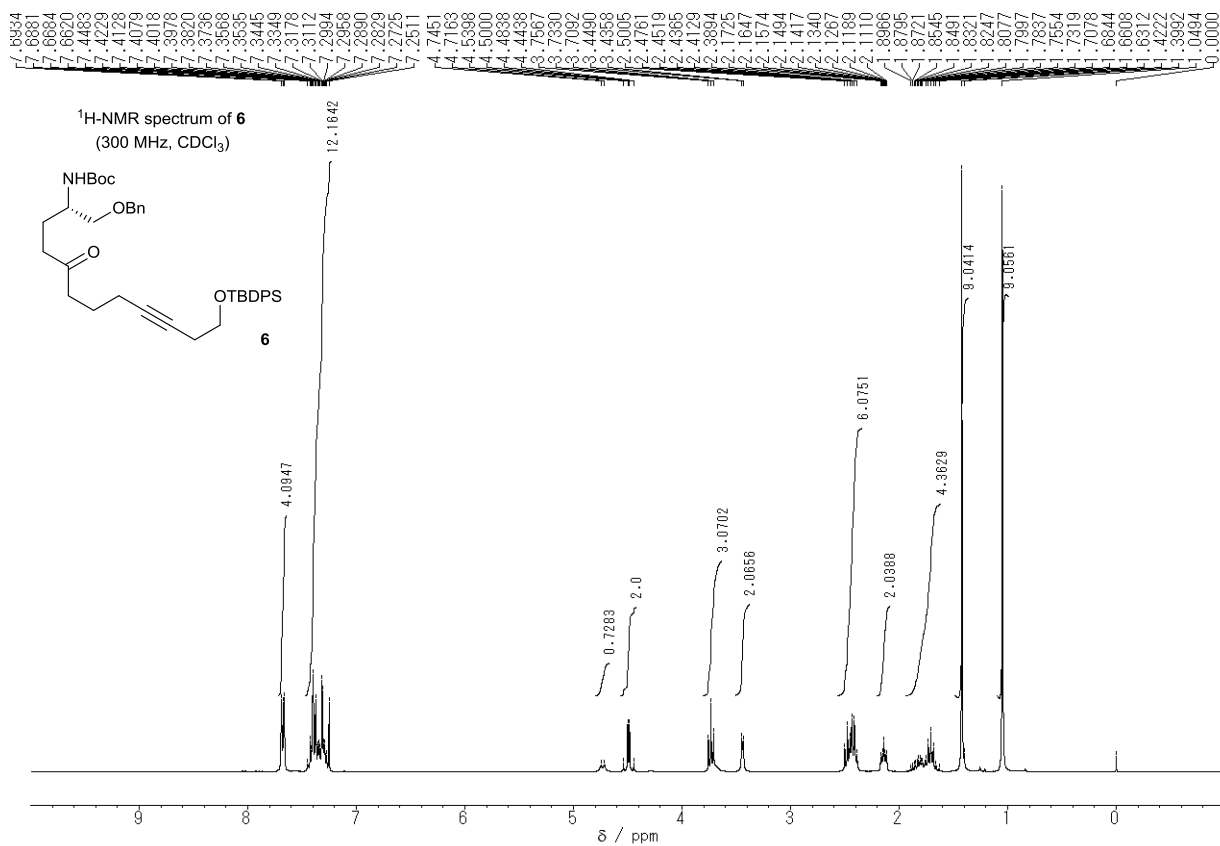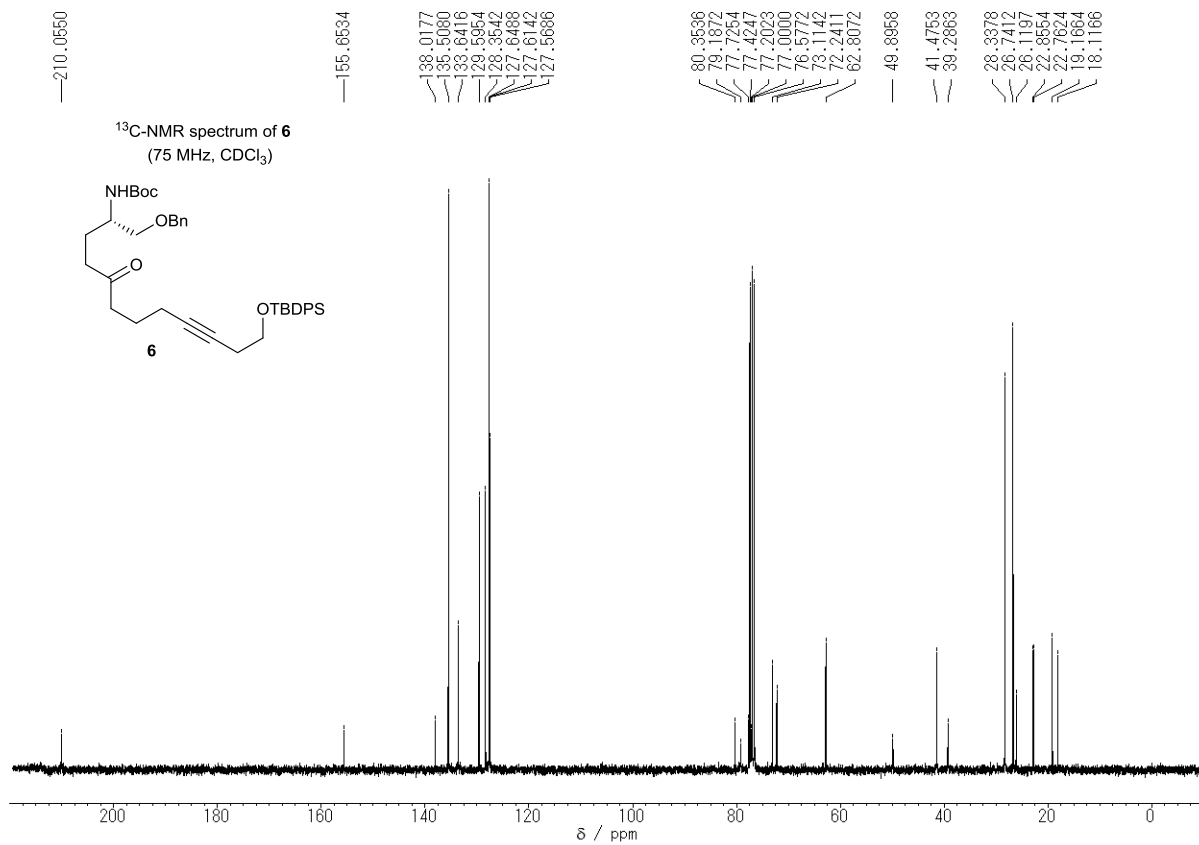

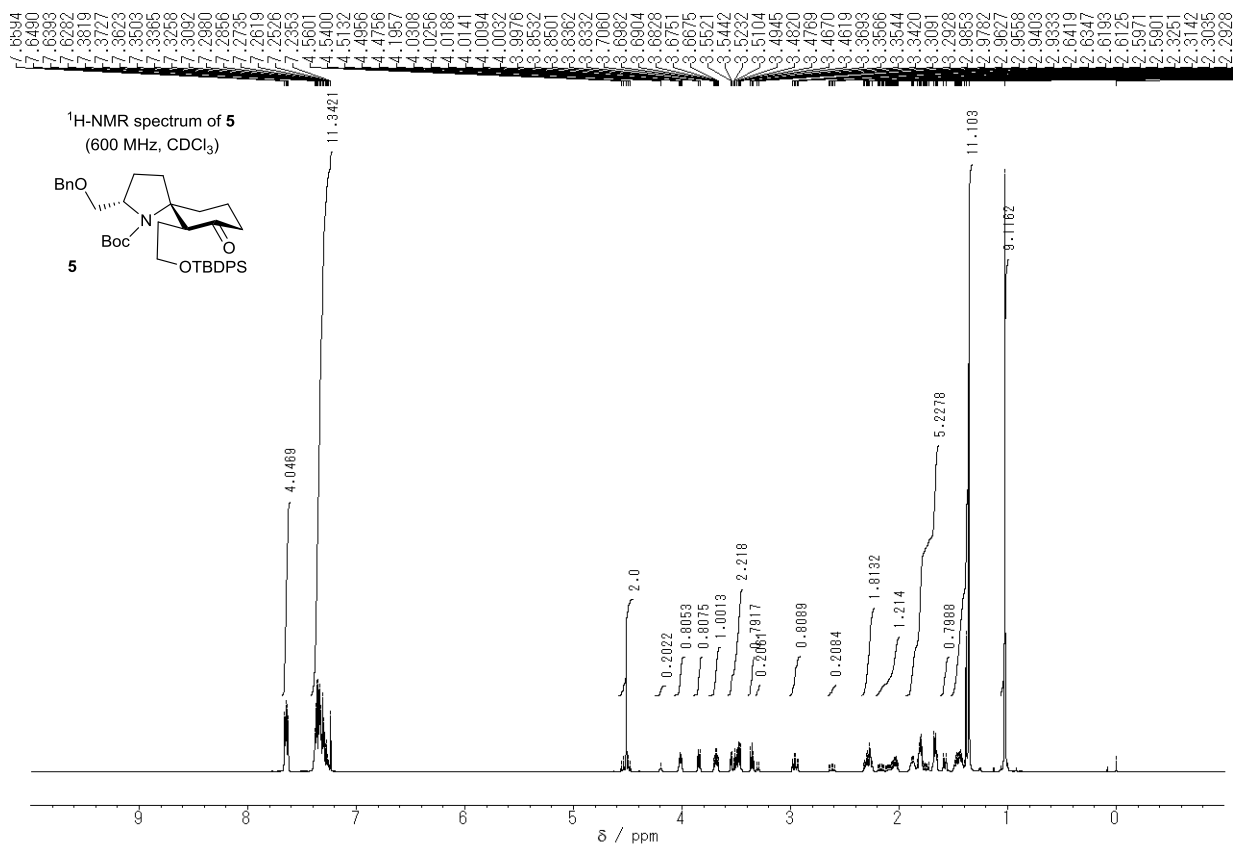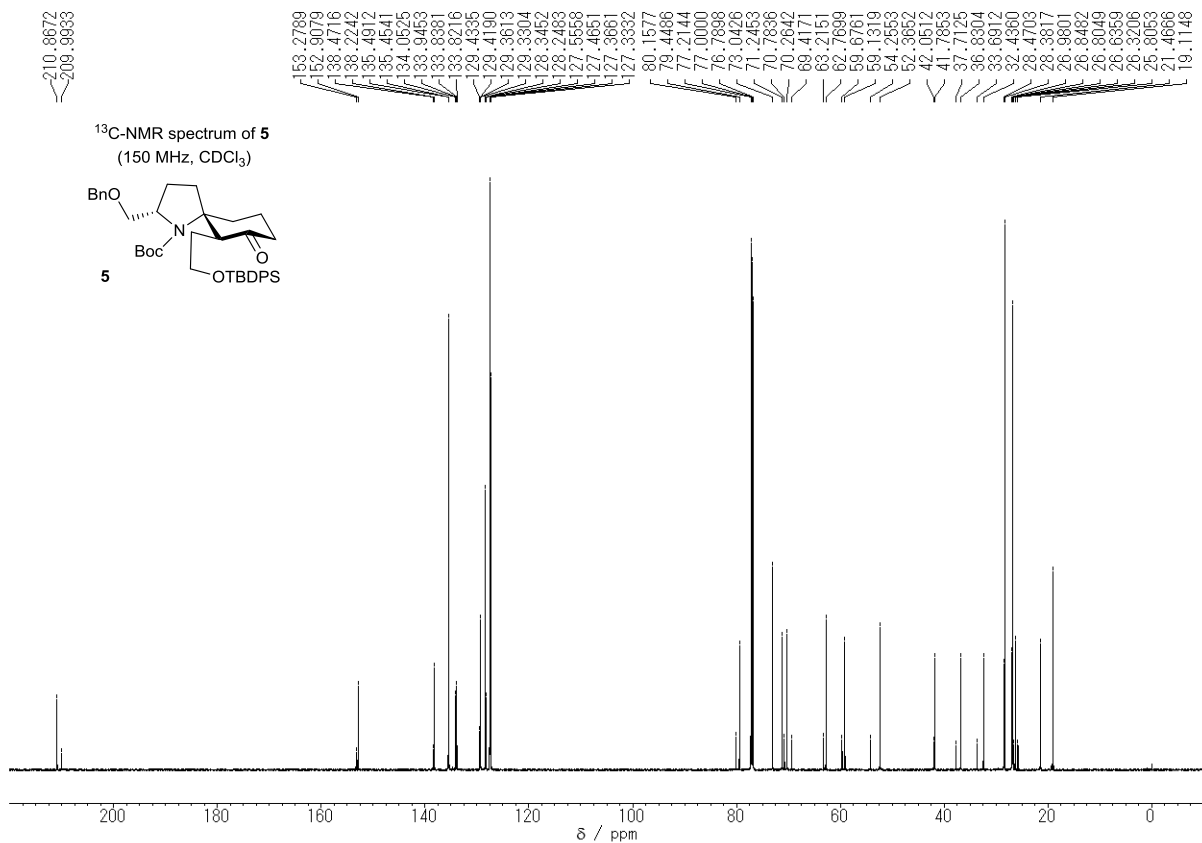

atsumura 7-12\_noesy\_CDCl3-temp25

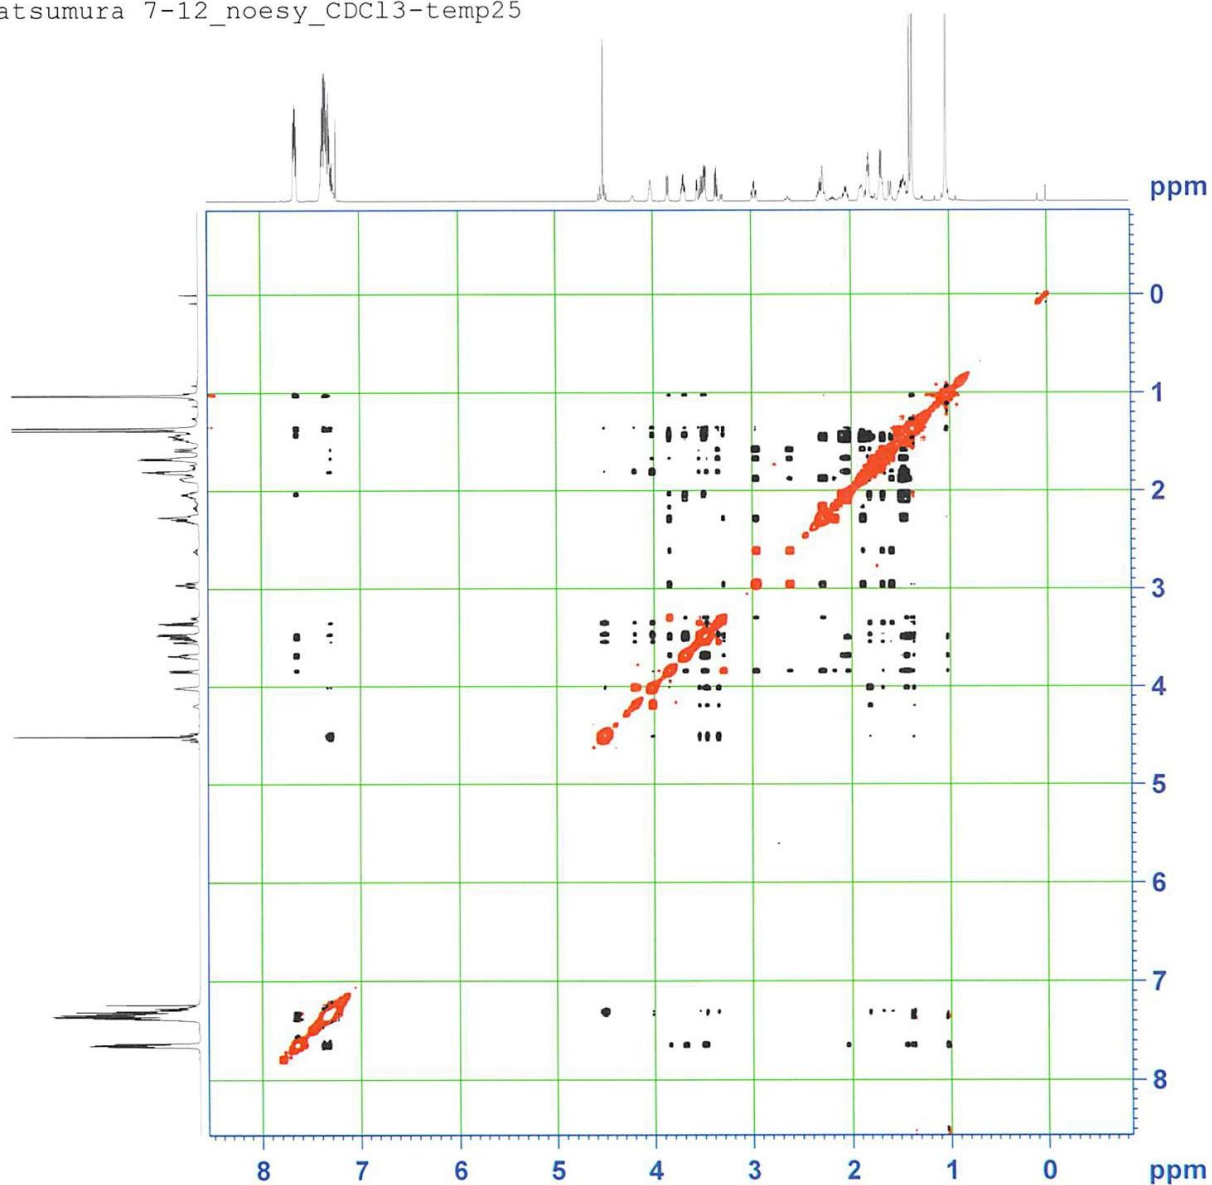

NOESY spectrum of **5**  
(two rotamers in a 4:1 ratio, 25 °C)  
(CDCl<sub>3</sub>)

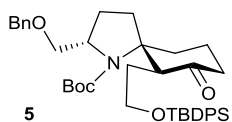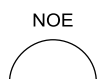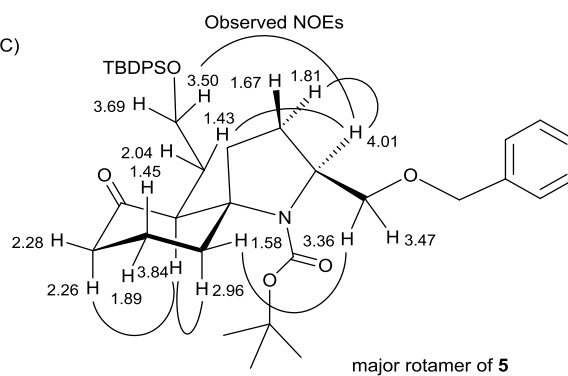

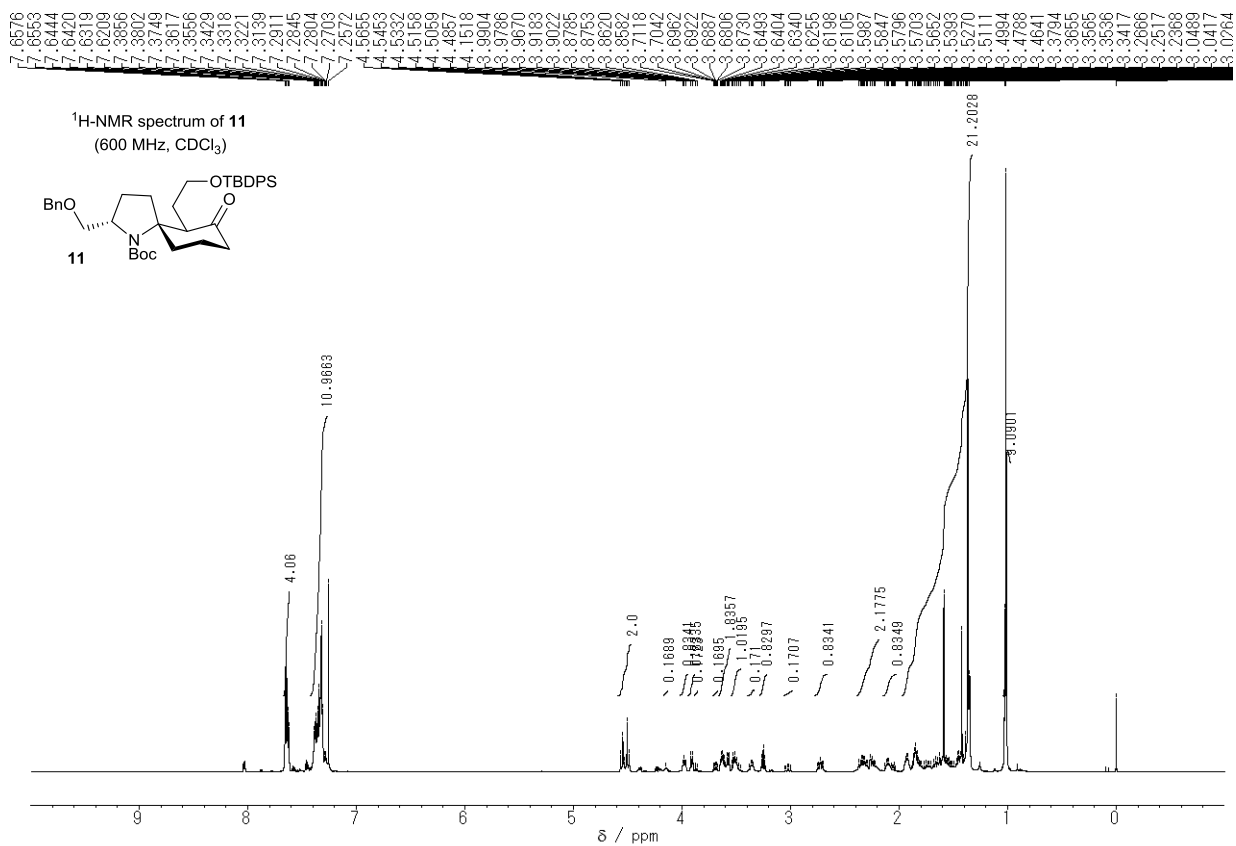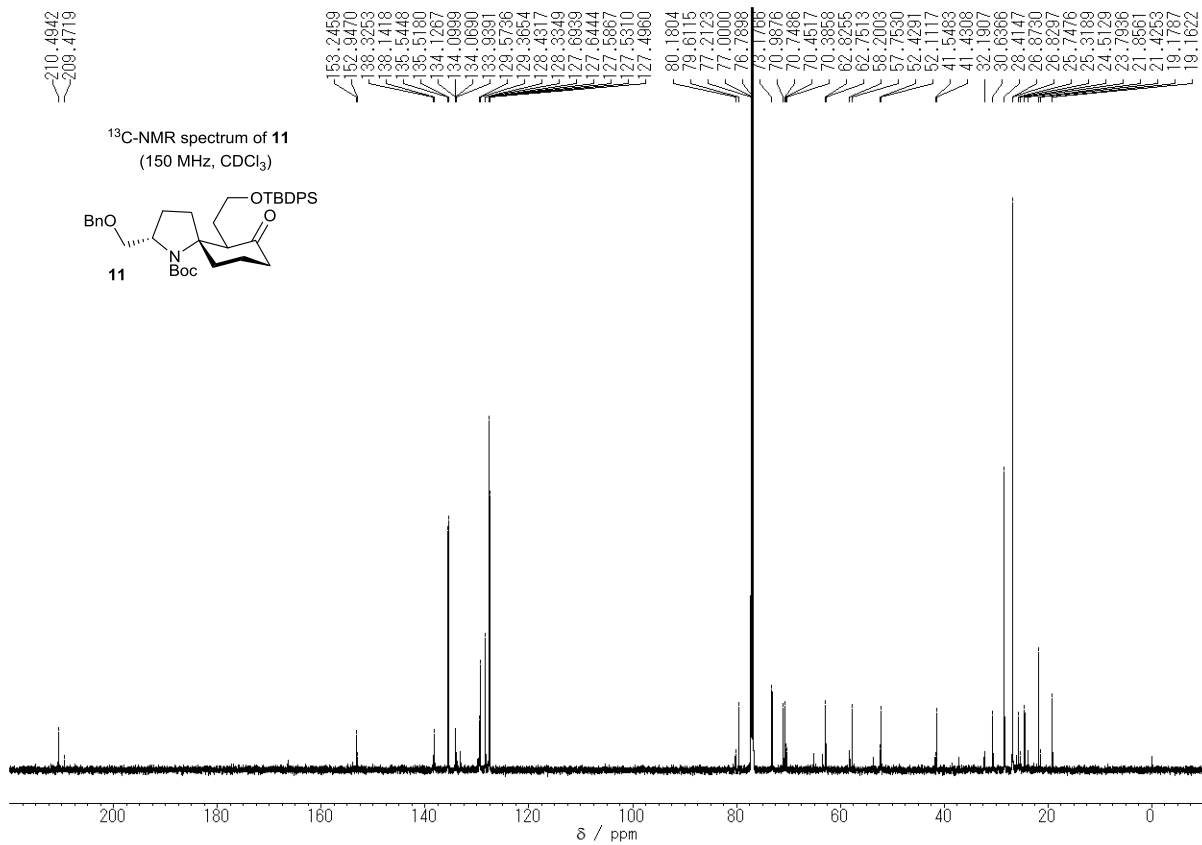

oesy\_CDC13-temp25

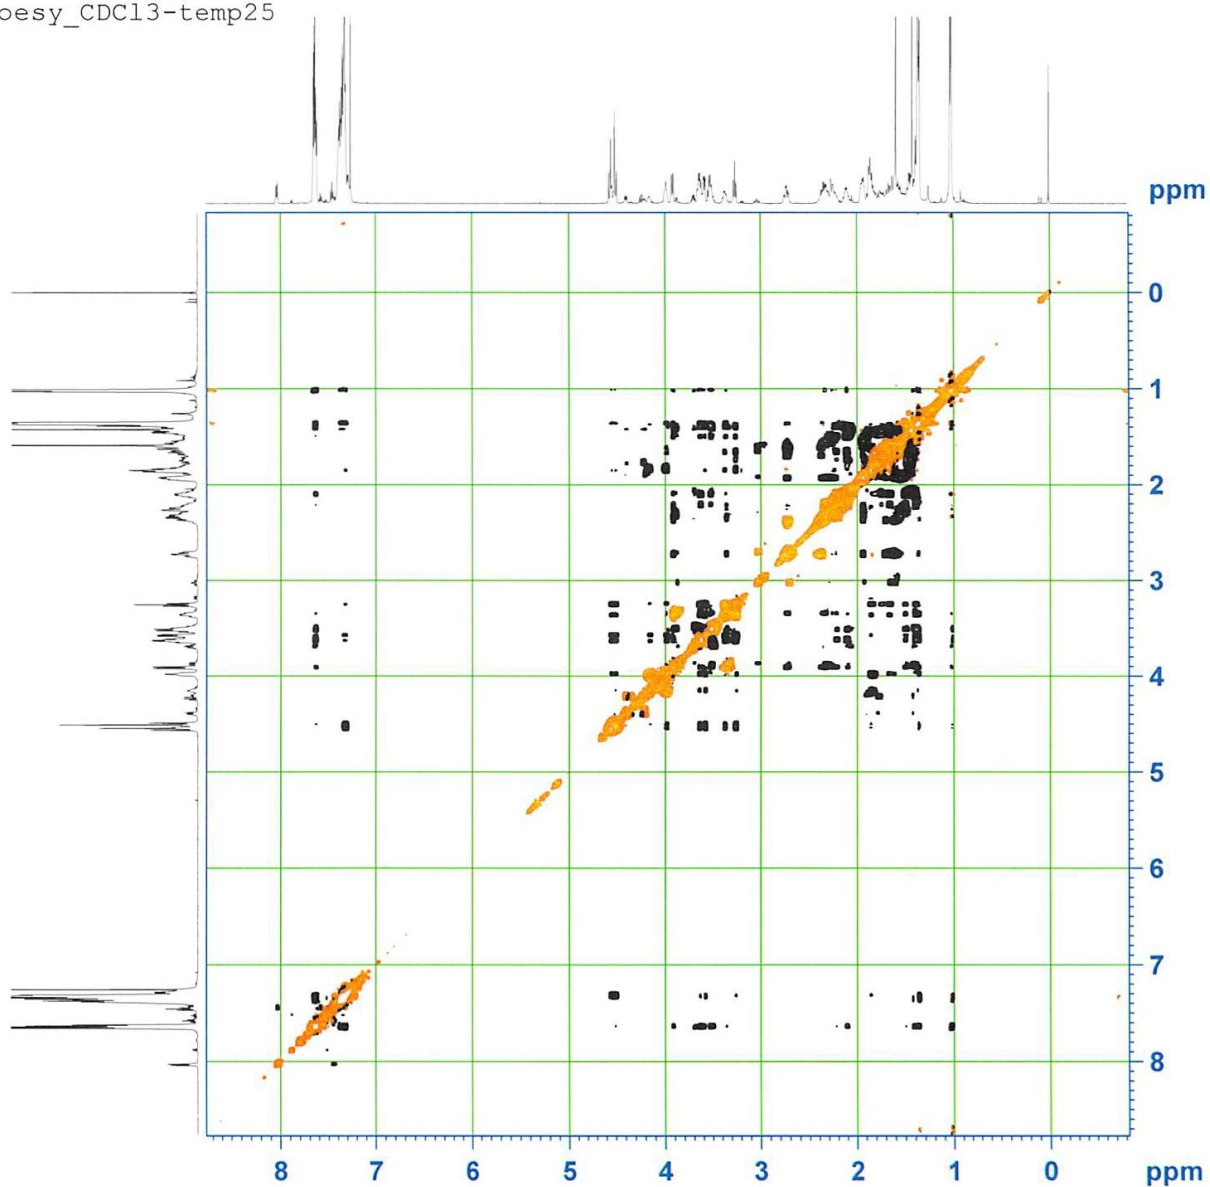

NOESY spectrum of **11**  
(two rotamers in a 5:1 ratio, 25 °C)  
(CDCl<sub>3</sub>)

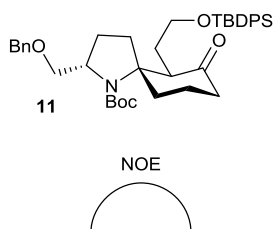

Observed NOEs

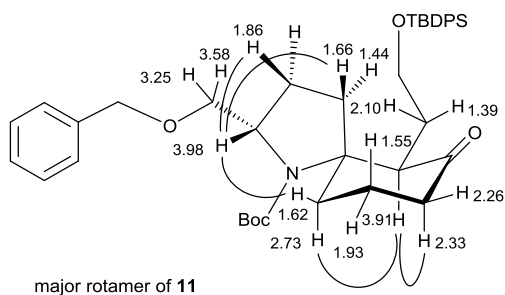

7.6908  
7.6807  
7.6700  
7.6588  
7.6472  
7.4215  
7.4086  
7.3908  
7.3802  
7.3674  
7.3440  
7.3315  
7.3182  
7.2982  
7.2868  
7.2700  
7.2549  
4.7475  
4.5459  
4.5242  
4.5030  
4.4836  
4.4721  
4.4626  
4.4519  
4.2357  
4.2305  
4.1143  
4.1021  
4.0917  
3.9245  
3.9164  
3.9120  
3.9067  
3.8993  
3.7895  
3.7823  
3.7722  
3.7647  
3.7561  
3.6939  
3.6866  
3.6779  
3.6699  
3.6624  
3.6326  
3.6264  
3.6160  
3.6099  
3.5993  
3.5932  
3.5784  
3.5741  
3.5637  
3.5599  
3.5477  
3.5431  
3.4896  
3.4854  
3.4786  
3.4633  
3.4506  
3.4486  
3.4358  
3.4141  
3.3805  
3.3625  
3.3452  
3.3041

<sup>1</sup>H-NMR spectrum of *eq-12*  
(600 MHz, CDCl<sub>3</sub>)

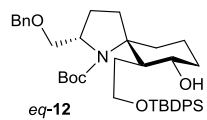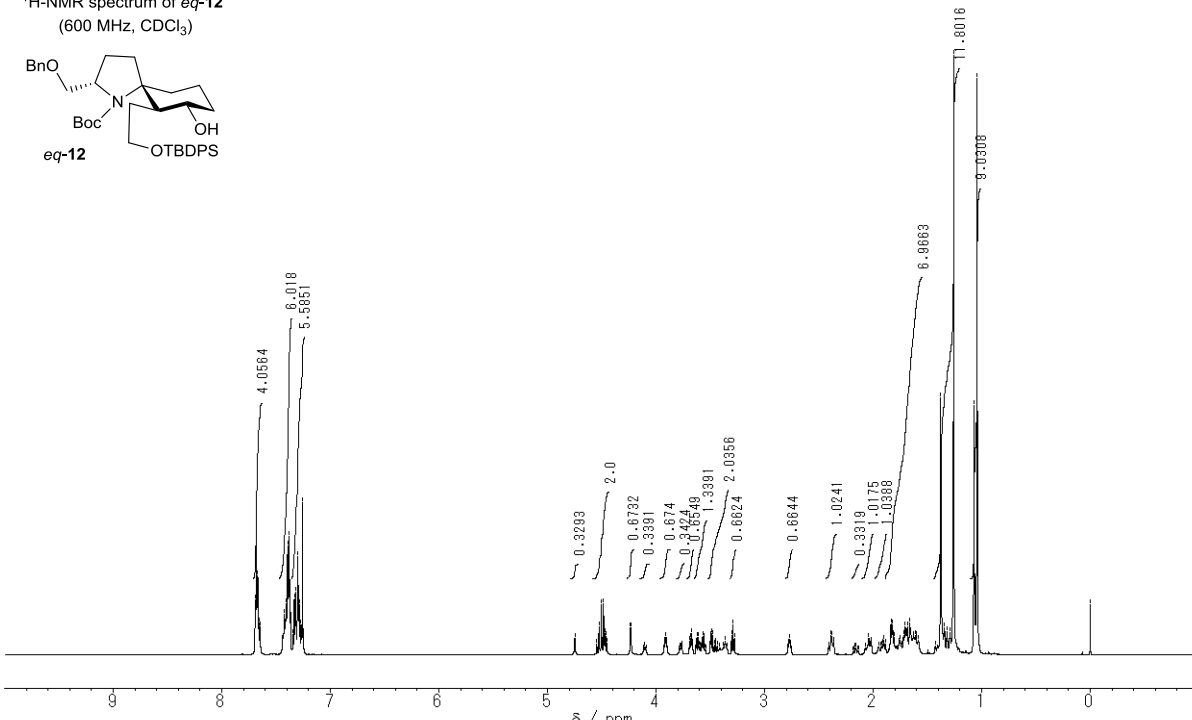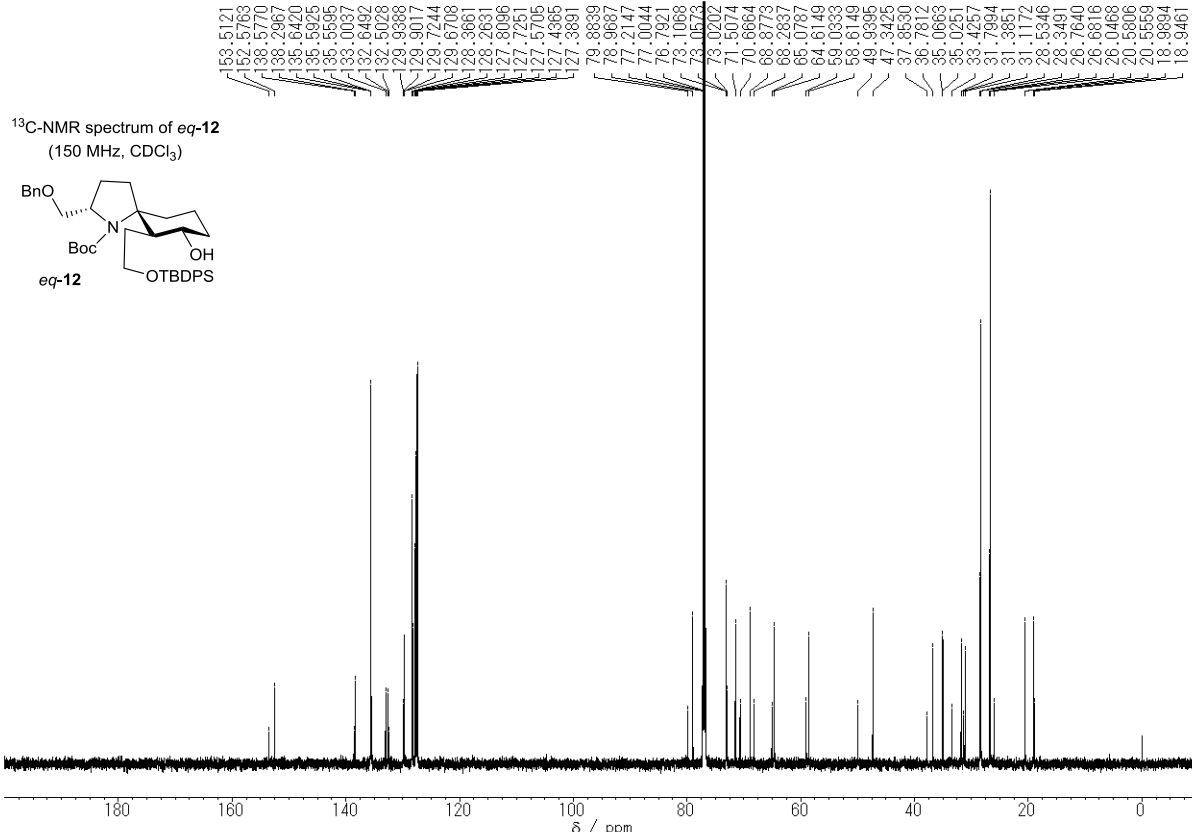

<sup>13</sup>C-NMR spectrum of *eq-12*  
(150 MHz, CDCl<sub>3</sub>)

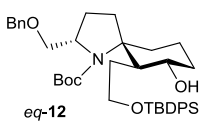



12\_noesy\_CDC13-temp25

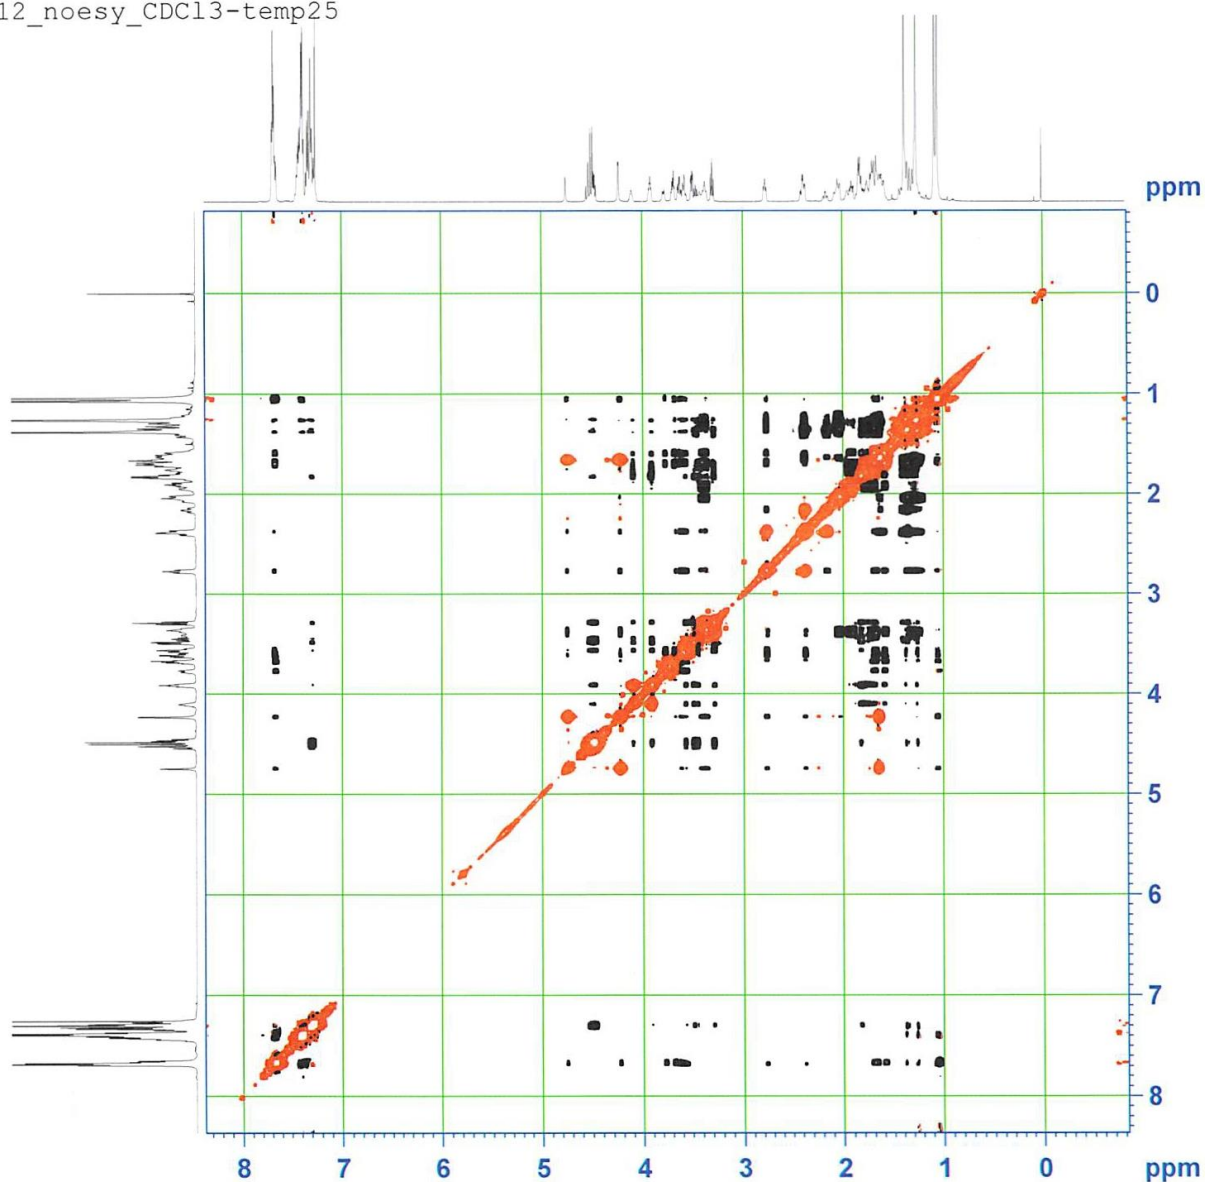

NOESY spectrum of *eq-12*  
(two rotamers in a 2:1 ratio, 25 °C)  
(CDCl<sub>3</sub>)

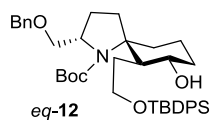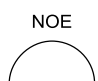

Observed NOEs

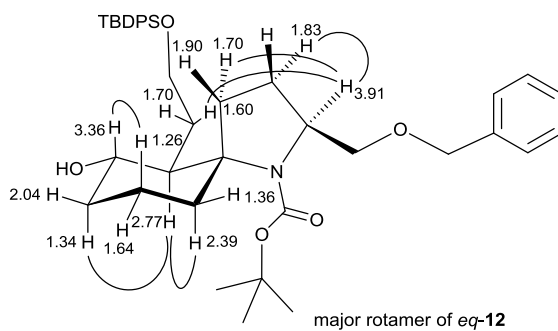

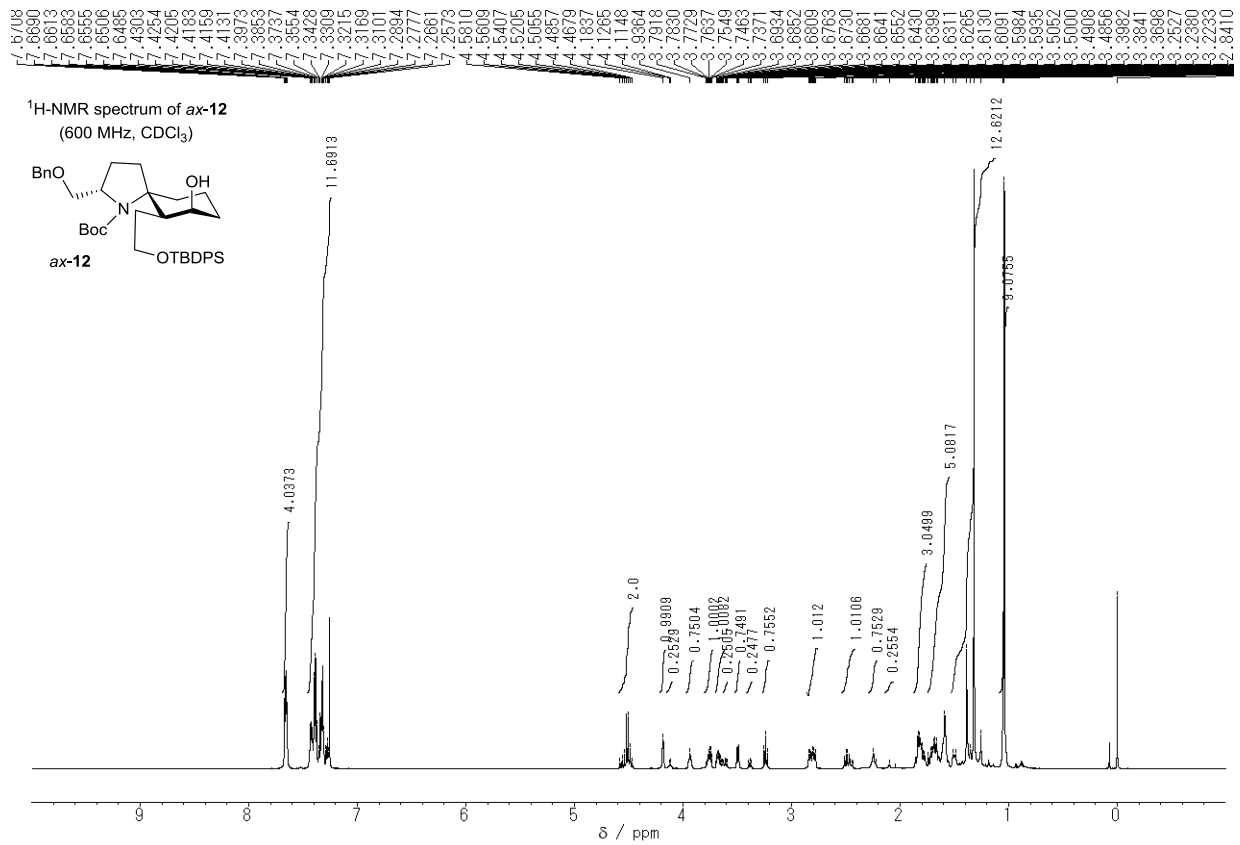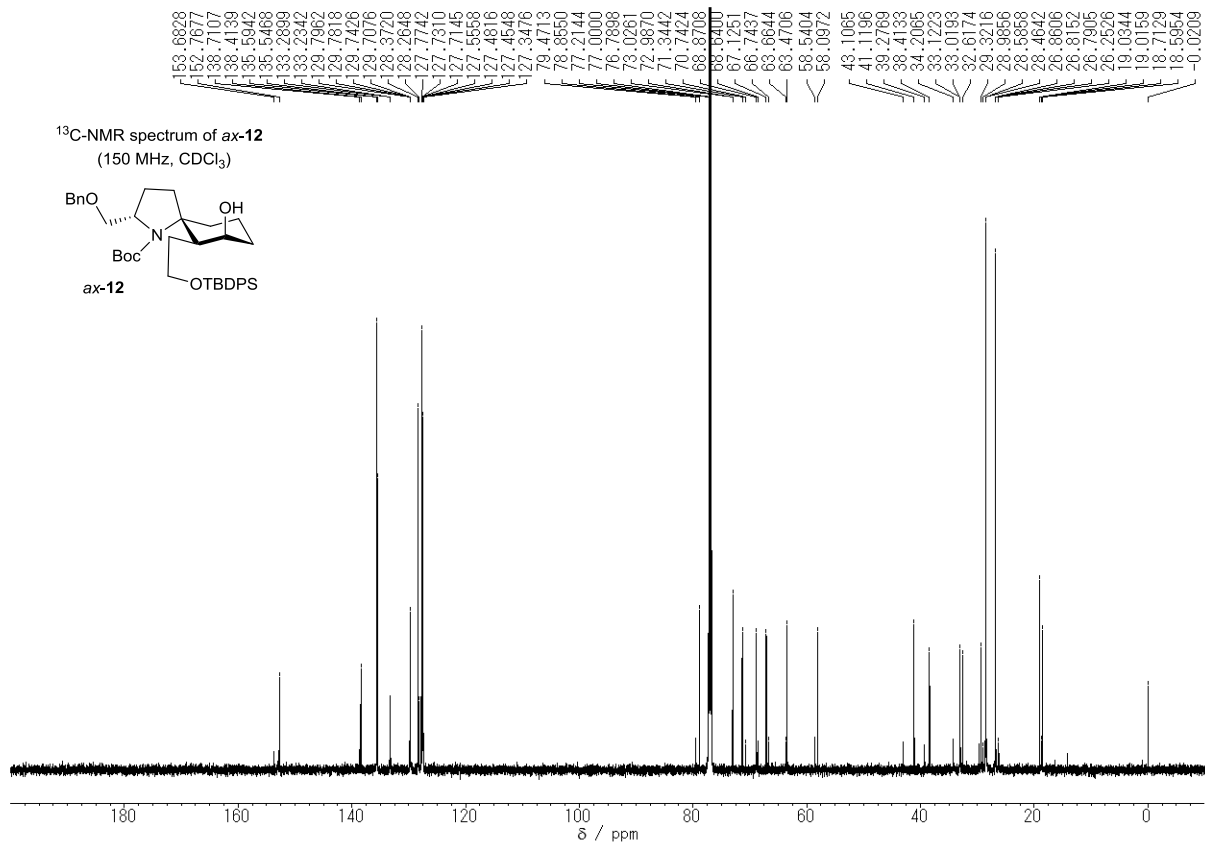

i axial alcohol\_noesy\_CDCl3-temp25

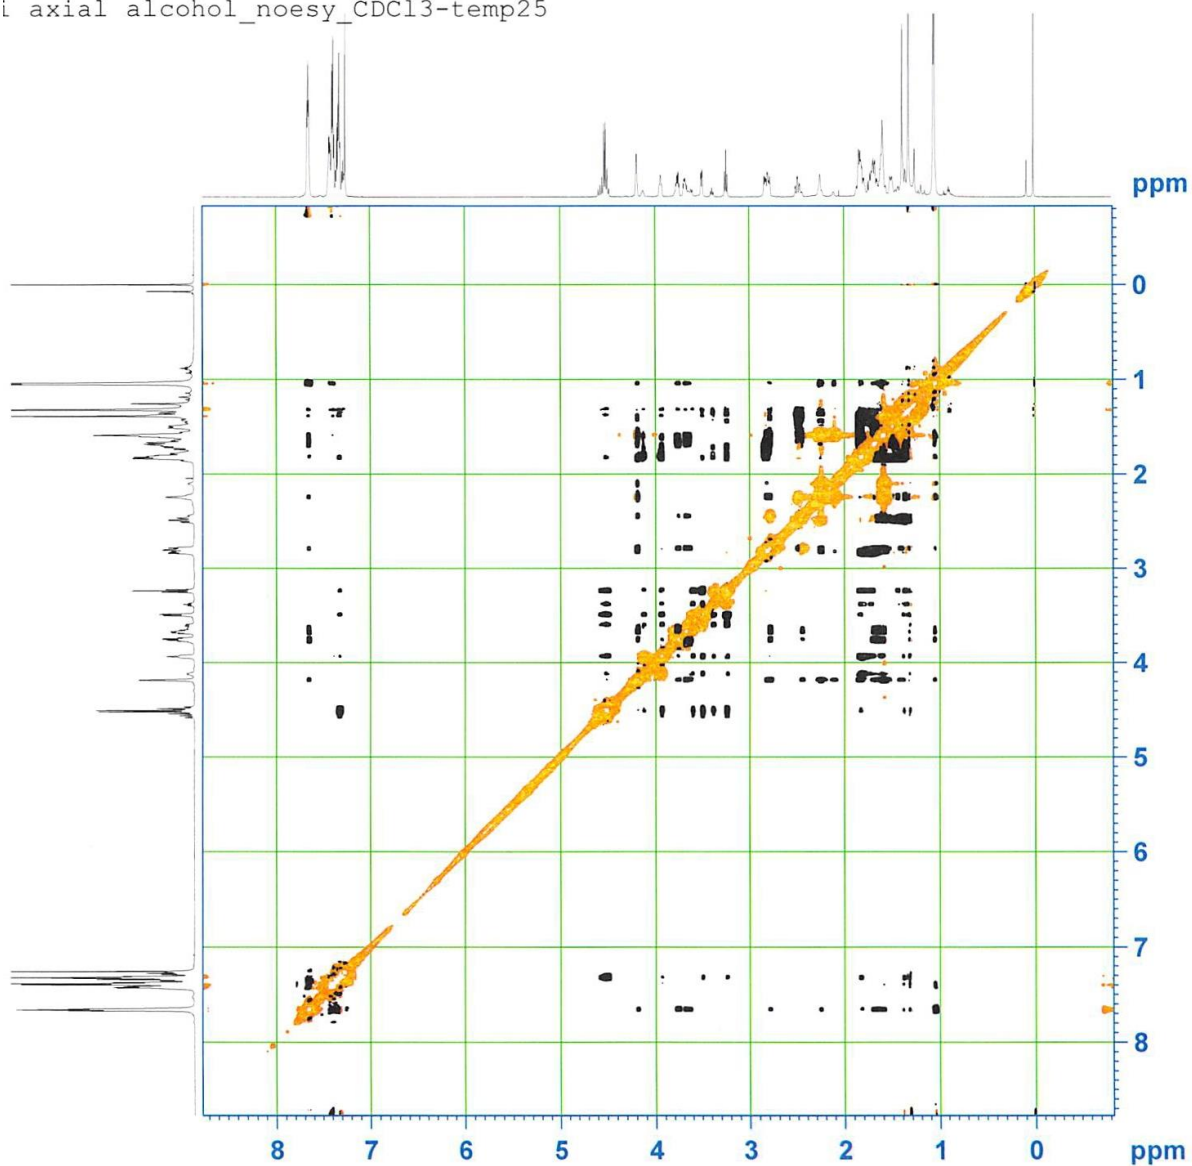

NOESY spectrum of *ax-12*  
(two rotamers in a 3:1 ratio, 25 °C)  
(CDCl<sub>3</sub>)

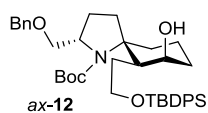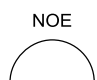

Observed NOEs

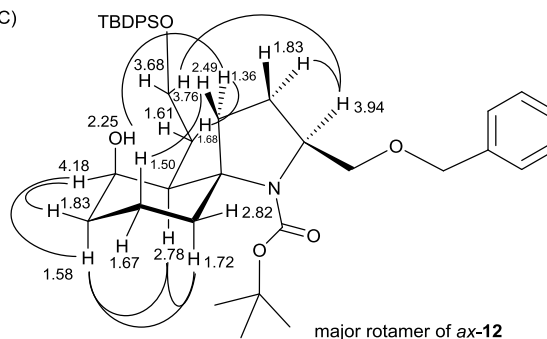

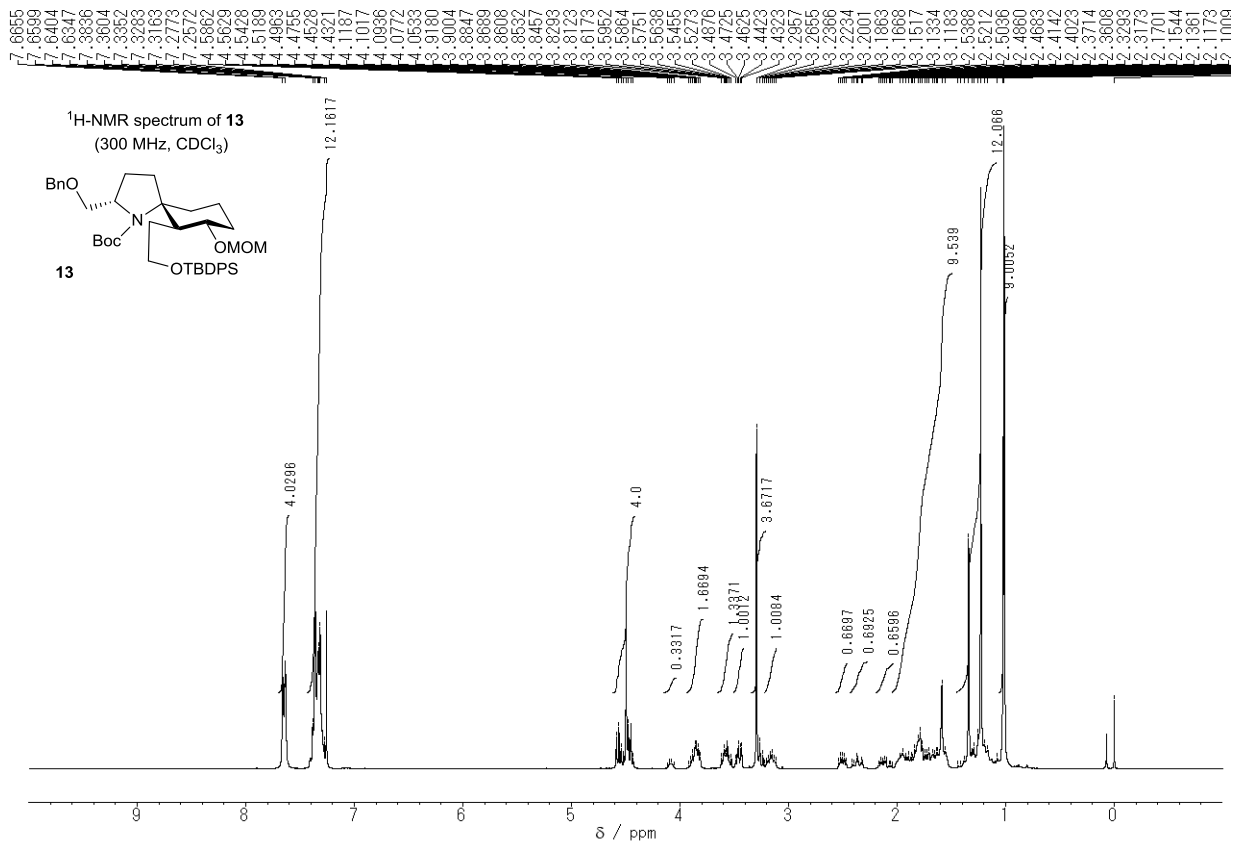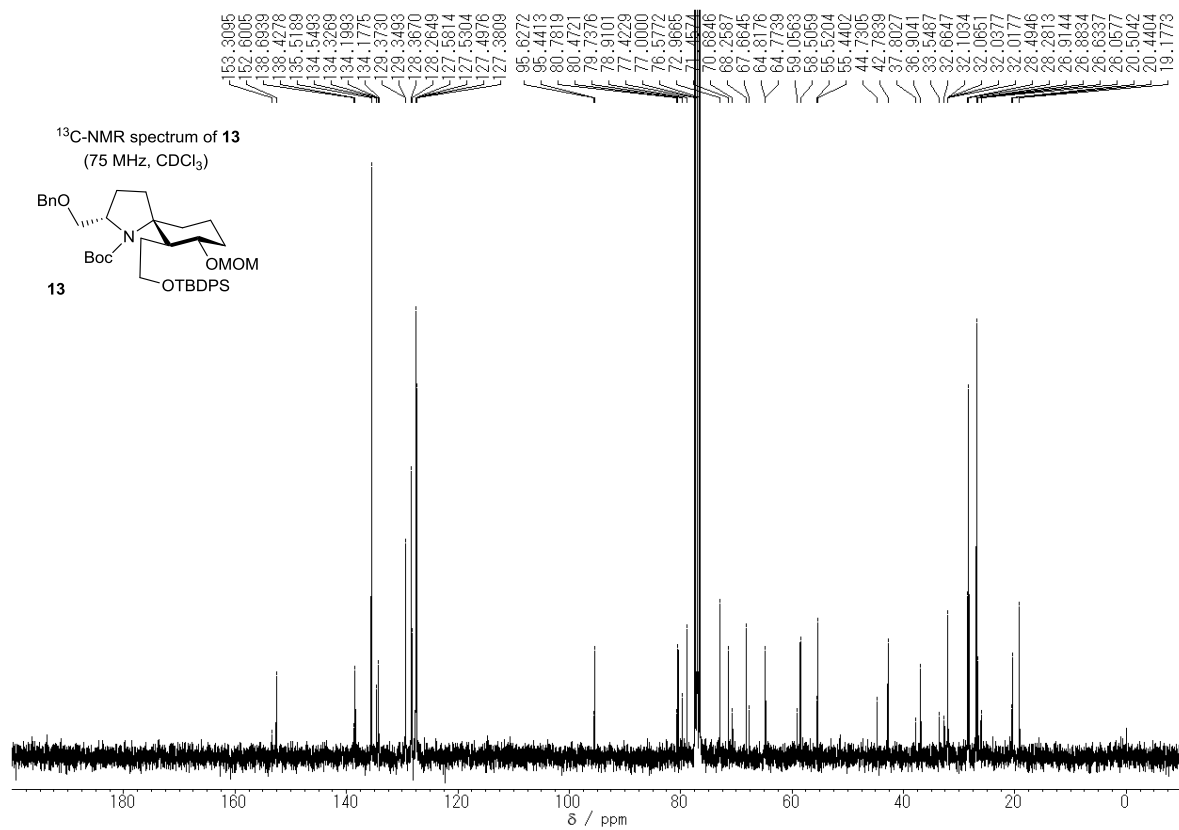

7.6612  
7.6558  
7.6358  
7.6299  
7.4192  
7.4043  
7.3947  
7.3730  
7.3673  
7.3488  
7.3280  
7.2616  
4.5637  
4.5403  
4.5247  
4.5012  
4.4537  
4.4301  
4.3019  
4.2867  
4.2736  
4.2564  
4.1302  
4.1096  
4.1045  
4.0979  
4.0830  
3.9466  
3.9301  
3.9145  
3.9085  
3.8878  
3.8911  
3.8760  
3.8583  
3.7111  
3.7001  
3.6364  
3.6164  
3.6041  
3.5979  
3.5930  
3.5834  
3.5785  
3.5658  
3.5576  
3.5464  
3.5260  
3.5156  
3.2924  
3.2815  
3.1738  
3.1590  
3.1390  
3.1241  
3.1086  
3.0896  
3.0748  
3.0429  
2.7089  
2.6836  
2.5263  
2.5153  
2.5054  
2.4931  
2.4796  
2.4680  
2.4591  
2.3174  
2.3017

<sup>1</sup>H-NMR spectrum of **14**  
(300 MHz, CDCl<sub>3</sub>)

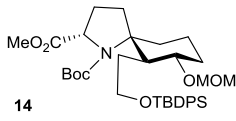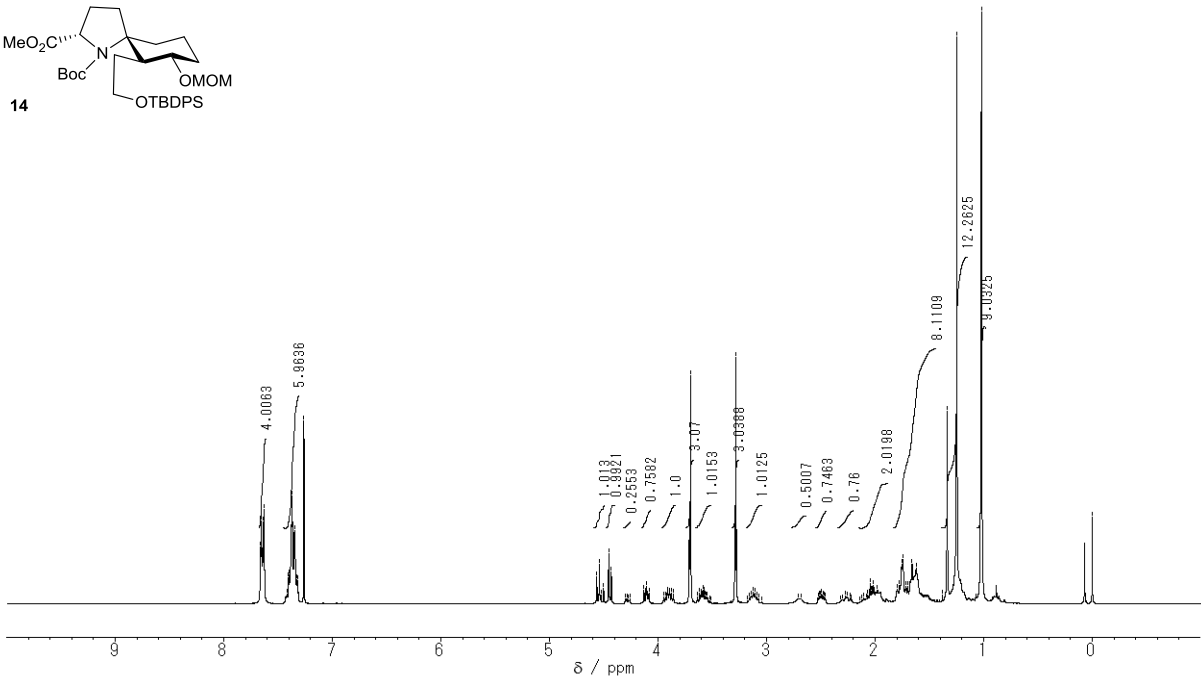

174.0382  
173.8705  
153.6176  
152.1740  
135.4916  
135.4733  
134.5110  
134.2540  
134.1939  
134.1155  
129.4388  
129.4059  
129.3894  
129.3603  
127.5905  
127.5158  
127.4957  
127.4739  
95.4759  
95.2463  
80.5067  
80.4265  
80.1495  
79.6355  
77.4247  
77.0000  
76.5772  
69.2739  
68.4373  
64.8194  
64.7976  
61.6499  
61.5897  
55.5022  
55.3874  
51.9517  
51.8167  
44.9310  
43.1085  
35.0250  
33.3154  
32.5608  
32.2473  
32.1216  
32.0596  
31.9175  
30.2090  
28.3824  
28.0389  
27.3791  
27.3299  
26.8870  
26.6501  
20.5771  
19.1518  
19.1154

<sup>13</sup>C-NMR spectrum of **14**  
(75 MHz, CDCl<sub>3</sub>)

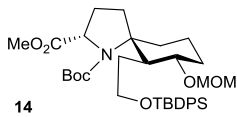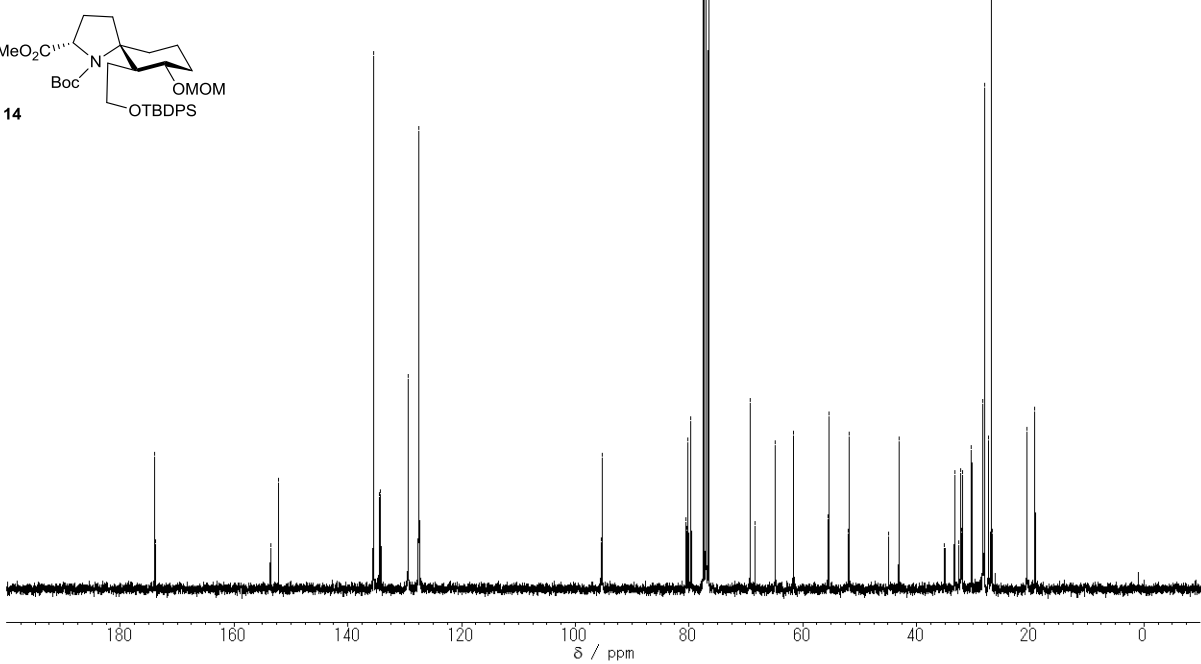

7.2692  
4.8220  
4.7863  
4.7647  
4.6361  
4.6120  
4.6043  
4.5805  
4.4136  
4.4047  
4.3944  
4.3863  
4.3750  
4.3671  
4.2861  
4.2783  
4.2711  
4.2596  
4.2356  
3.7209  
3.6185  
3.4185  
3.3830  
3.2821  
3.2821  
3.2664  
3.2630  
3.2457  
3.2312  
3.2173  
3.1958  
3.1813  
3.0856  
2.8881  
2.8812  
2.8684  
2.8606  
2.8527  
2.8448  
2.8323  
2.8241  
2.5299  
2.5225  
2.5104  
2.5007  
2.4950  
2.4882  
2.4731  
2.4657  
2.3190  
2.3069  
2.2763  
2.2636  
2.2318  
2.2152  
2.1901  
2.1735  
2.1598  
2.1478  
2.1343  
2.1231  
2.1079  
2.1017  
2.0874  
2.0752  
2.0649  
2.0468  
1.8862  
1.8626  
1.8537  
1.8478

<sup>1</sup>H-NMR spectrum of **15**  
(300 MHz, CDCl<sub>3</sub>)

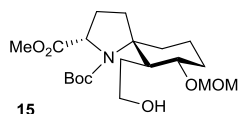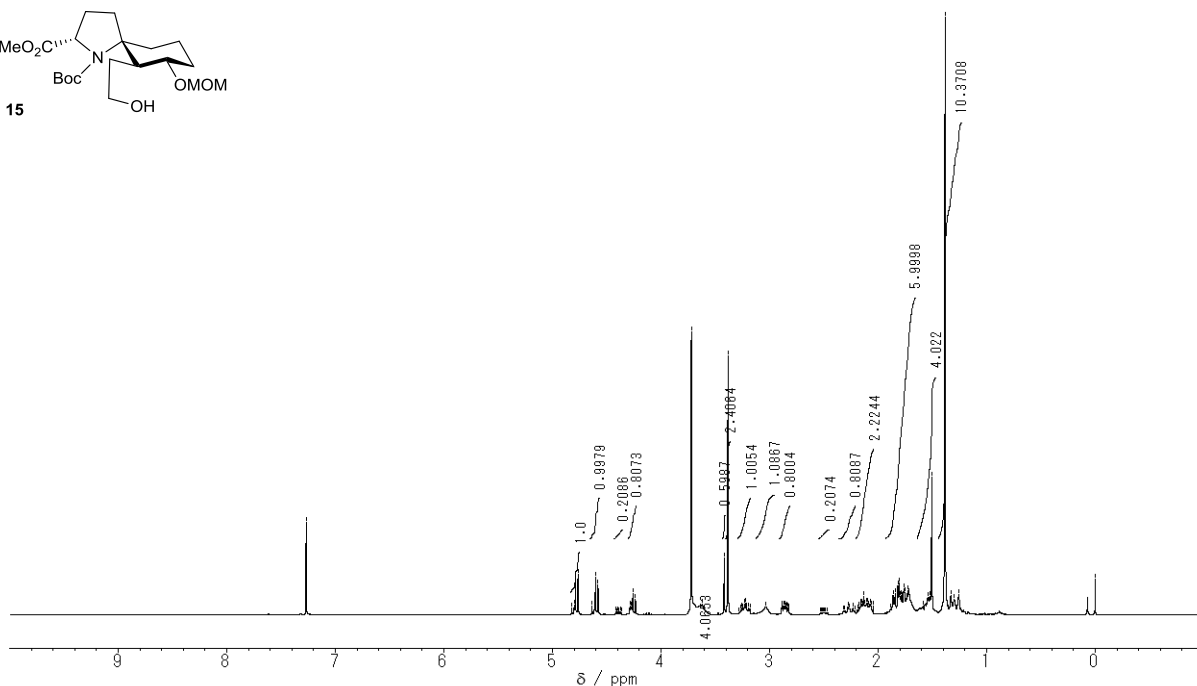

<sup>13</sup>C-NMR spectrum of **15**  
(75 MHz, CDCl<sub>3</sub>)

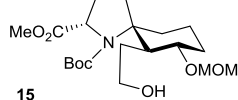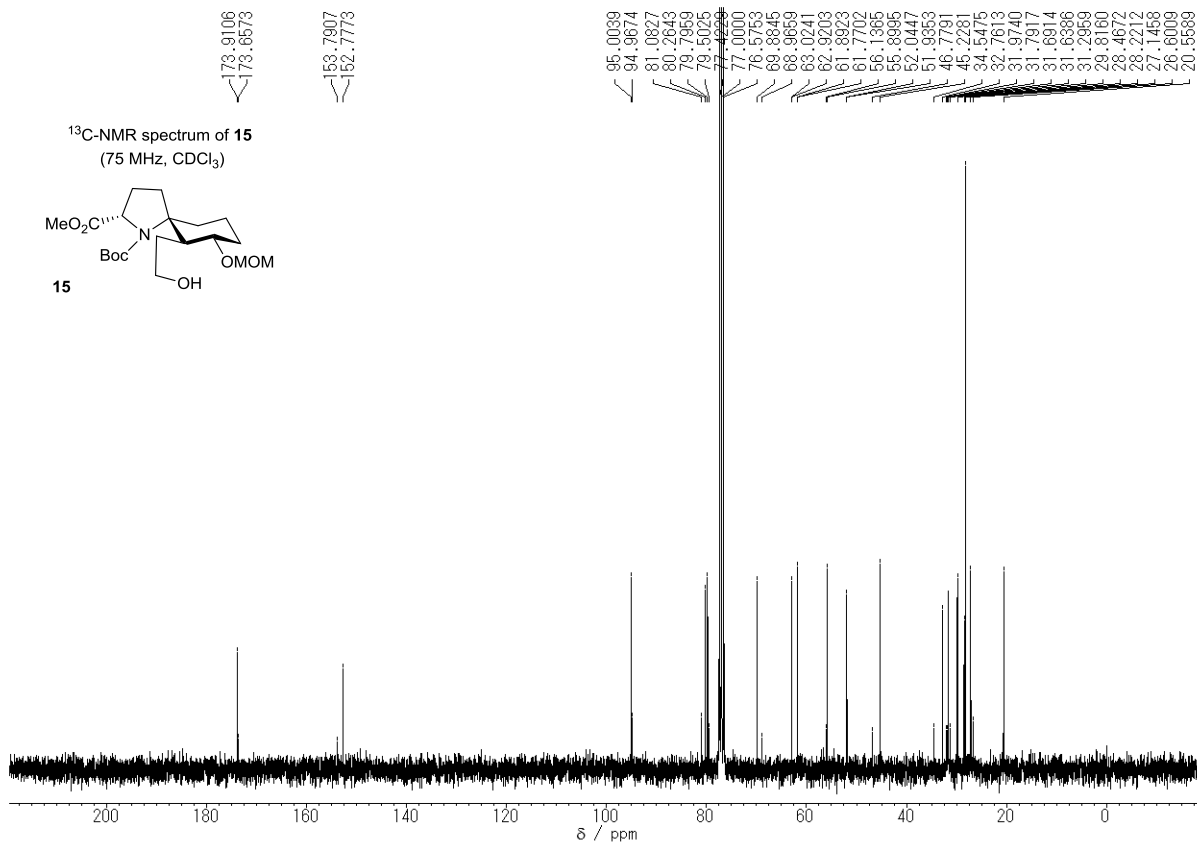

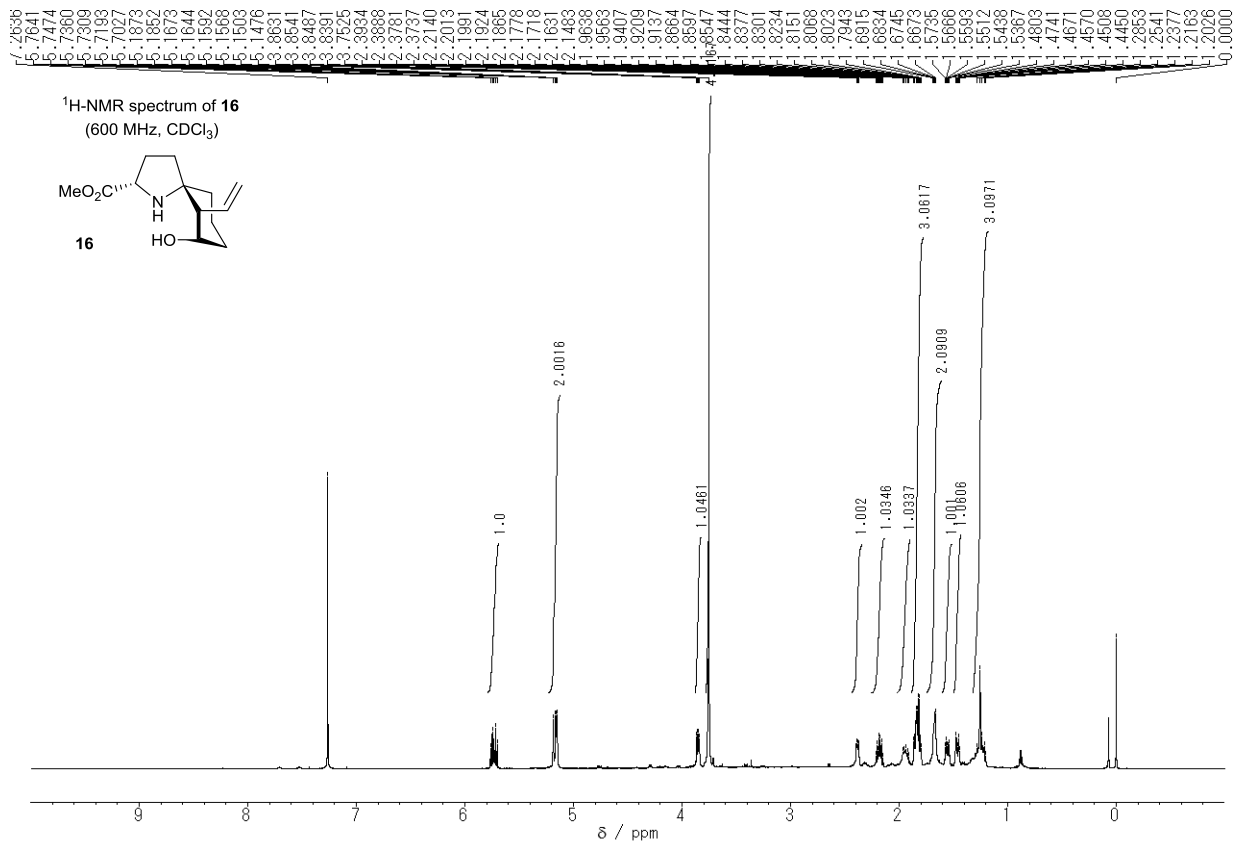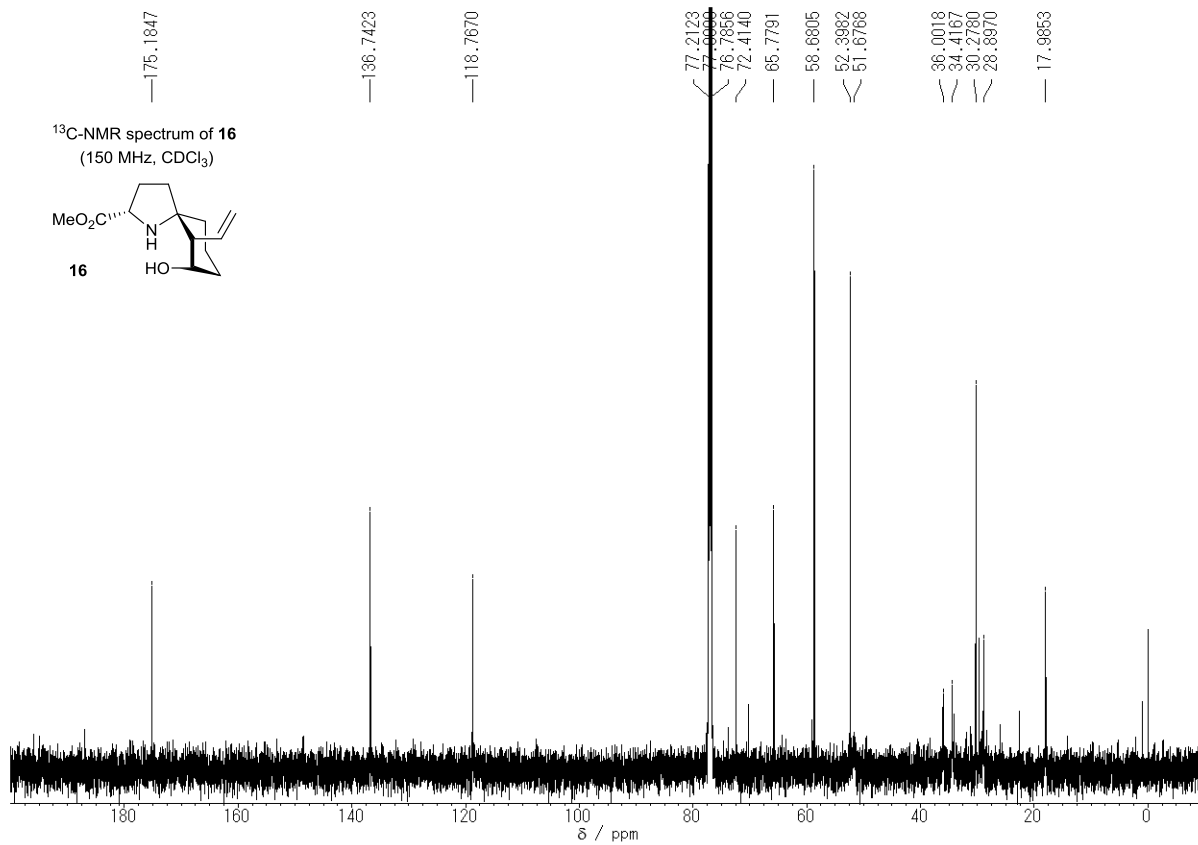

i-7-59\_noesy\_CDC13-temp25

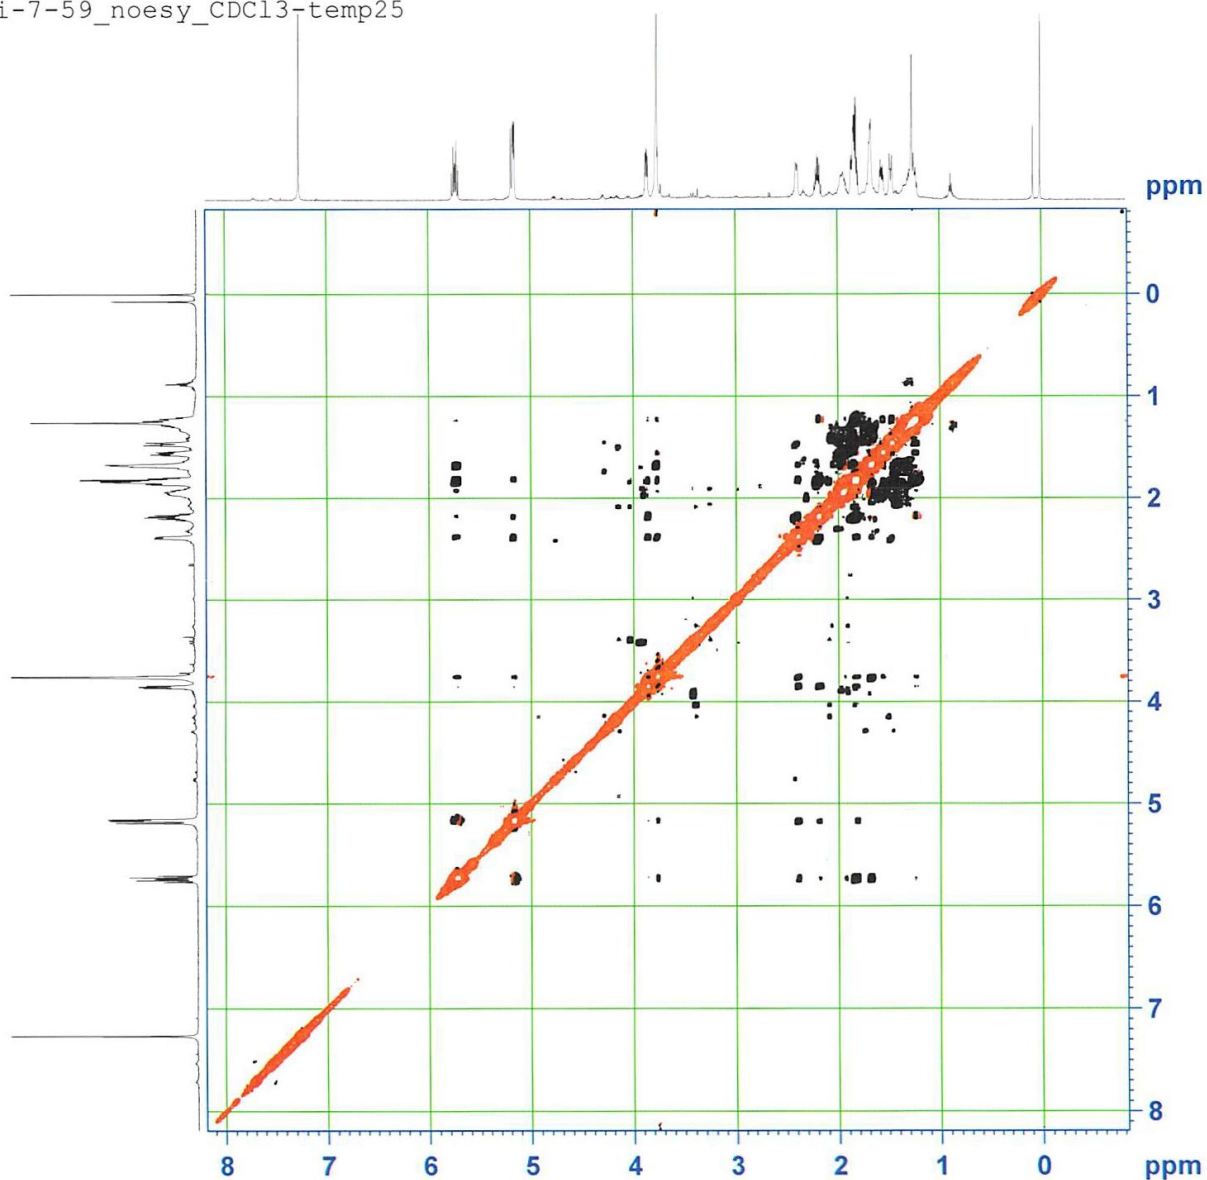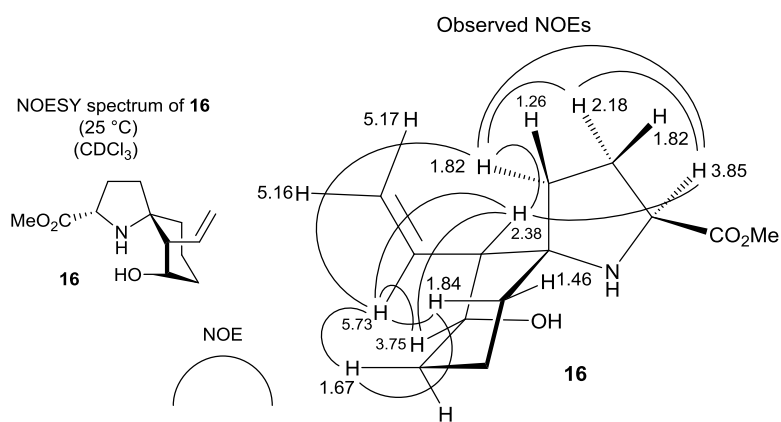





l TBDPS protection\_noesy\_CDCl3-temp25

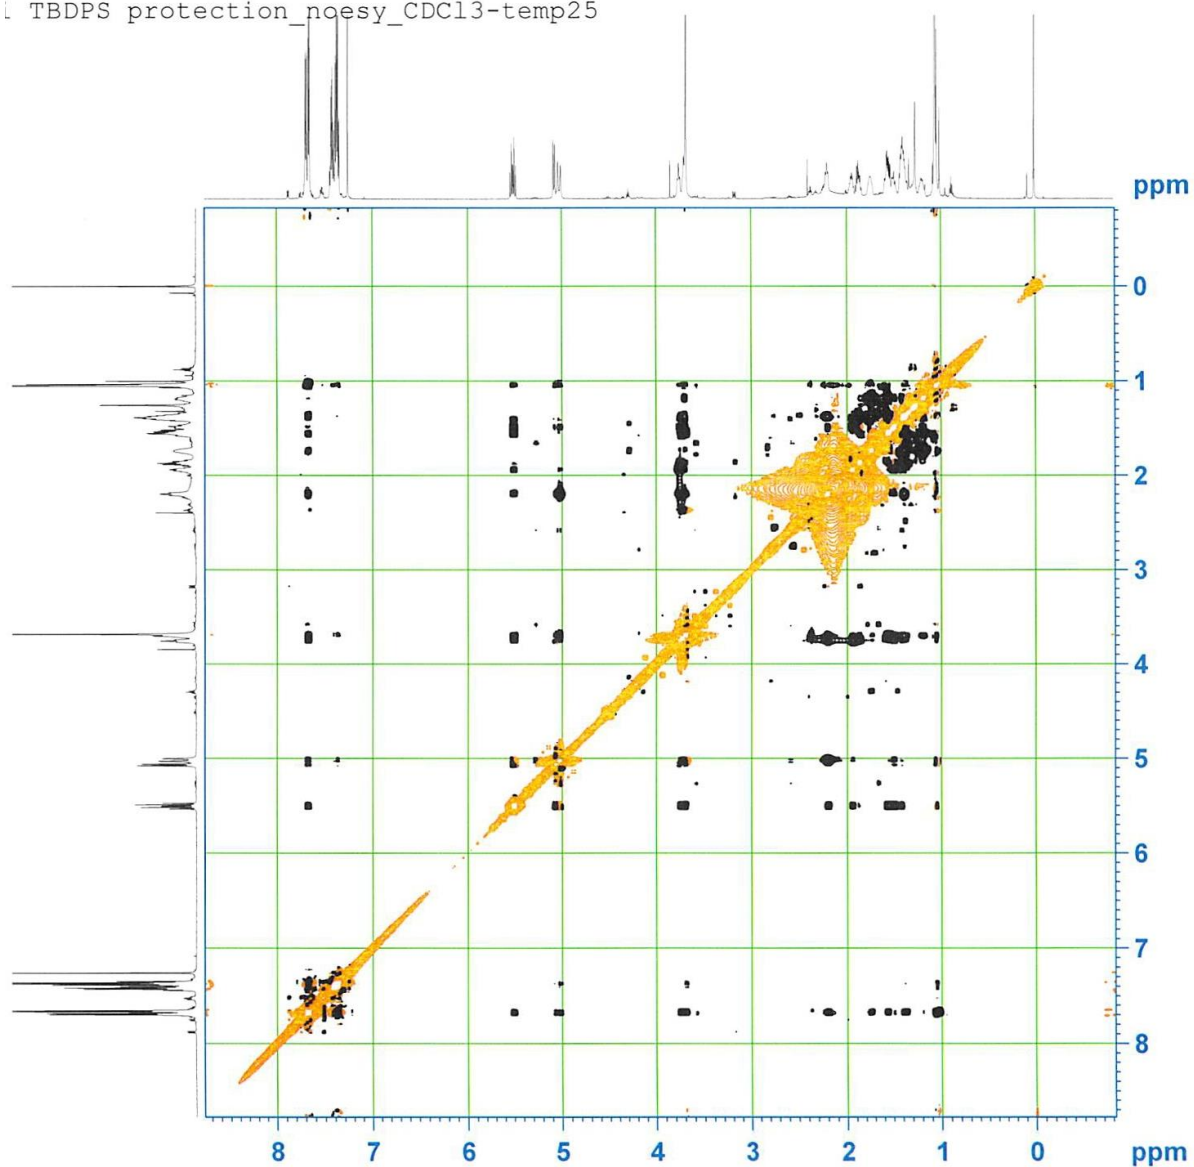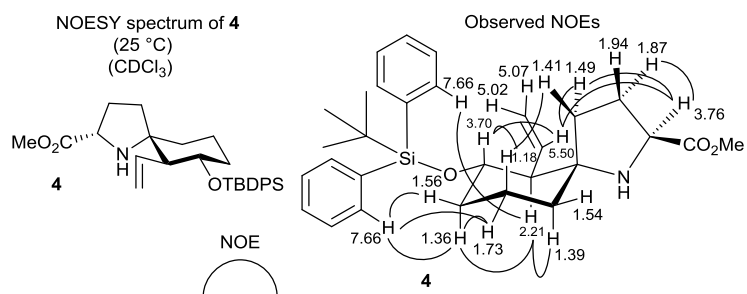

7.7191  
7.6991  
7.6825  
7.6637  
7.6644  
7.6580  
7.4493  
7.4405  
7.4315  
7.4262  
7.4178  
7.4120  
7.4063  
7.3878  
7.3805  
7.3667  
7.3593  
7.2627  
6.5310  
6.4971  
6.4746  
6.4635  
6.4410  
6.4073  
4.9868  
4.9807  
4.9529  
4.9467  
4.8569  
4.8524  
4.8008  
4.7962  
6.8947  
6.8823  
6.8719  
6.8570  
2.3800  
2.3696  
2.3474  
2.3196  
2.3059  
2.3007  
2.2839  
2.2600  
2.2510  
2.2271  
2.2095  
2.2019  
2.1922  
2.1694  
2.0141  
1.9856  
1.9685  
1.9554  
1.9232  
1.9131  
1.8892  
1.8740  
1.7654  
1.7524  
1.7448  
1.7083  
1.6861  
1.6841  
1.6769  
1.6681  
1.6580  
1.6449  
1.6319  
1.4735

<sup>1</sup>H-NMR spectrum of **3**  
(300 MHz, CDCl<sub>3</sub>)

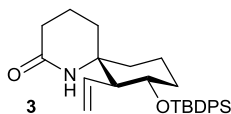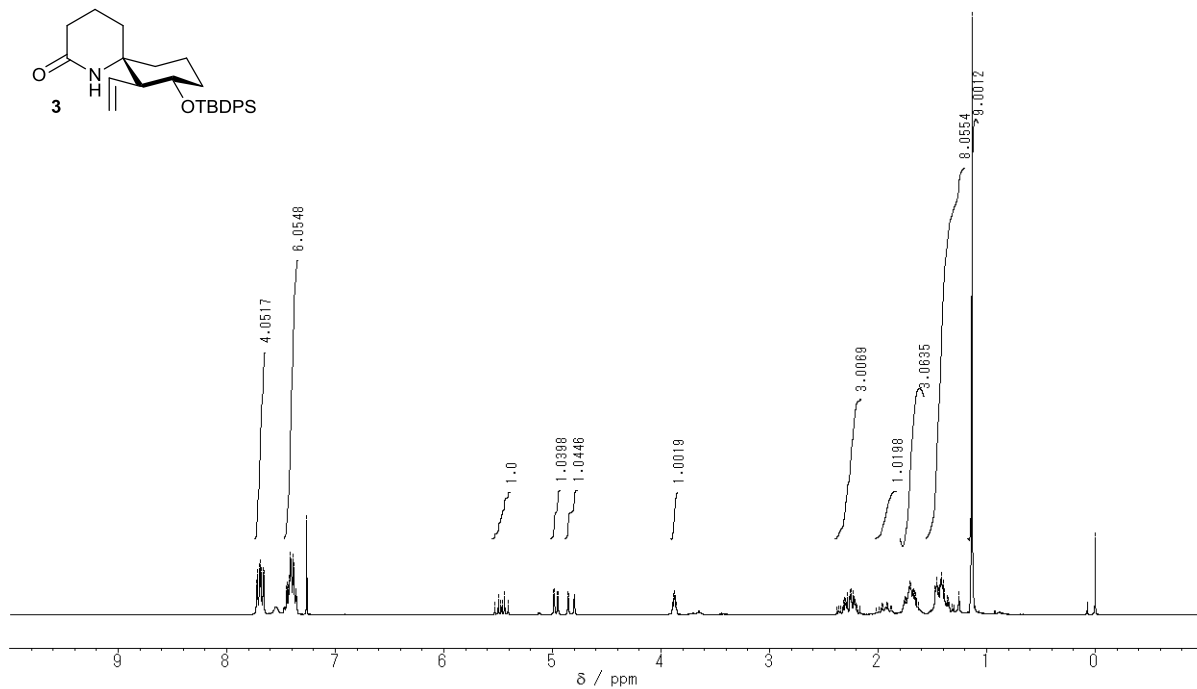

<sup>13</sup>C-NMR spectrum of **3**  
(75 MHz, CDCl<sub>3</sub>)

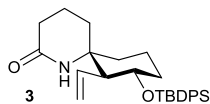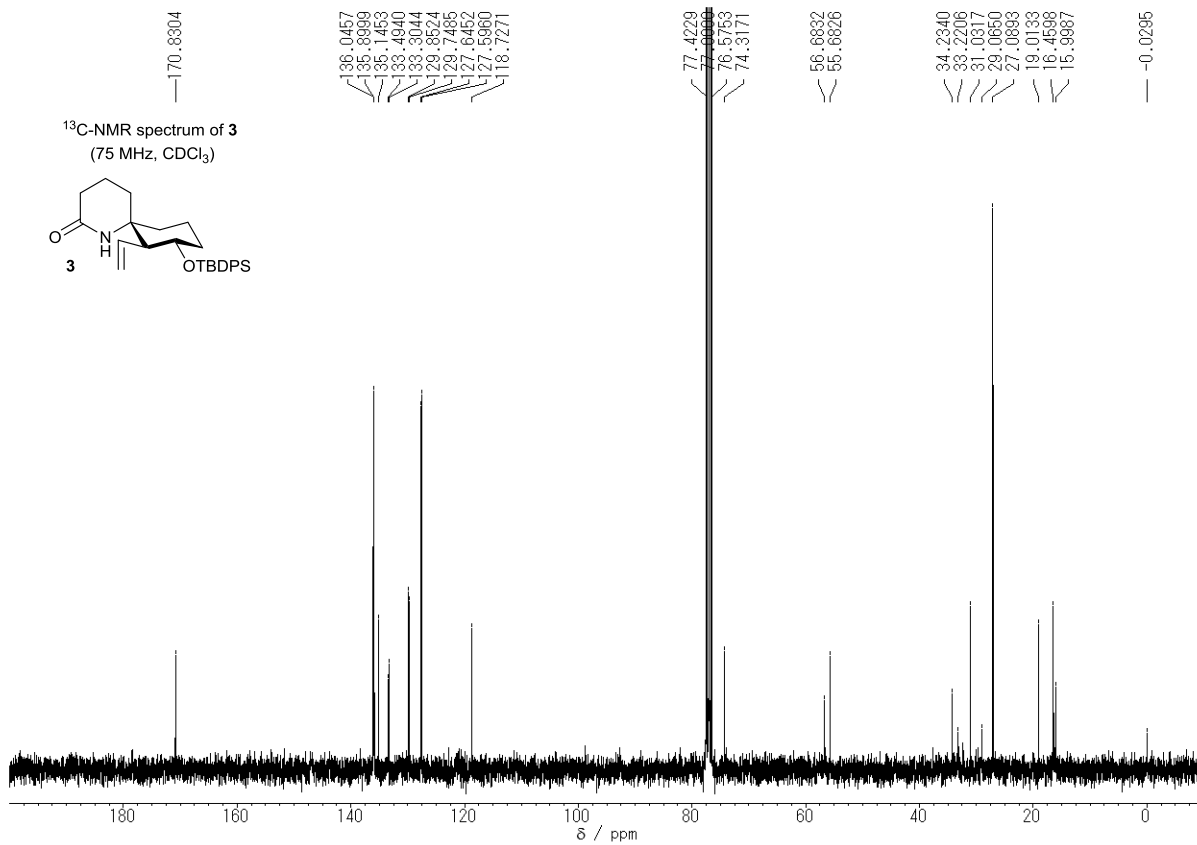

Supplement: c8ra02011f1.pdf [file c8ra02011f1.pdf]
